# Supplementary material for: Differential Privacy in Personalized Pricing with Nonparametric Demand Models
Source: Atypon-hosted journal article supplement (doi:10.1287/opre.2022.2347), 2022-08-31
Supplement: opre.2022.2347.sm1.pdf [file opre.2022.2347.sm1.pdf]

**This page is intentionally blank. Proper e-companion title page, with INFORMS branding and exact metadata of the main paper, will be produced by the INFORMS office when the issue is being assembled.**

# Supplementary material of “Differential Privacy in Personalized Pricing with Nonparametric Demand Models”

by Xi Chen, Sentao Miao, Yining Wang

## EC.1. Proof of Theorem 1

We first establish the  $\varepsilon$ -CDP property of Algorithm 1. For each  $t$  and  $k = k_t$  define  $\mathbf{u}_t := (u_{j,t,k_t})_{j \in J} \in \mathbb{R}^J$  and  $\mathbf{v}_t := (v_{j,t,k_t})_{j \in J}$ . It is clear that both  $\mathbf{u}_t, \mathbf{v}_t$  are one-hot vectors (i.e., having zero values except for one entry  $j = j_t$ ) and hence their  $\ell_1$  sensitivity is upper bounded by 2. Note also that each time TREEBASEDAGGREGATION is invoked, the resulting  $\widehat{S}_t$  consists of at most  $L + 1 = \lfloor \log_2 T \rfloor + 1$  partial sums. Therefore, by simple composition of Laplace mechanisms we have that all  $\{r_{j,k}(t), \mu_{j,k}(t)\}_{t=1}^T$  are  $\varepsilon$ -differentially private. Since other parts of Algorithm 1 (e.g., the updates of  $\rho_j$  and  $\varsigma_j$ ) no longer access the sensitive data  $\{s_t = (\mathbf{x}_t, \mathbf{y}_t, p_t)\}_{t=1}^T$  except for the offering price  $p_t$ , we conclude that Algorithm 1 satisfies  $\varepsilon$ -CDP thanks to the closedness-to-post-processing property of differential privacy.

In the rest of the proof we upper bound the regret of Theorem 1. For simplicity we will use the notation  $\text{const.}$  to denote any universal numerical constant that does not depend on any problem parameters. For  $j \in [J]$ ,  $t \in [T]$  and  $k \in [5]$  recall the definitions that  $u_{j,k,t} = \mathbf{1}\{j = j_t \wedge k = k_t\} p_t y_t$  and  $v_{j,k,t} = \mathbf{1}\{j = j_t \wedge k = k_t\}$ . We first state a technical lemma that upper bounds (with high probability) the deviation of  $r_{j,k}(t), \mu_{j,k}(t)$  from  $\sum_{s \leq t} u_{s,j,k}$  and  $\sum_{s \leq t} v_{s,j,k}$ , respectively.

LEMMA EC.1. *With probability  $1 - O(T^{-1})$  the following hold uniformly over all  $t \in [T]$ ,  $j \in [J]$  and  $k \in [5]$ :*

$$\max \left\{ \left| r_{j,k}(t) - \sum_{s \leq t} u_{s,j,k} \right|, \left| \mu_{j,k}(t) - \sum_{s \leq t} v_{s,j,k} \right| \right\} \leq 19\varepsilon^{-1} \ln^2(2T^3).$$

*Proof of Lemma EC.1.* We focus on the  $|r_{j,k}(t) - \sum_{s \leq t} u_{s,j,k}|$  term only as the proof for the other term is exactly the same. Let  $t = \sum_{\ell=0}^L b_\ell(t) 2^\ell$  where  $L = \lfloor \log_2 T \rfloor$  and  $b_\ell(t) \in \{0, 1\}$  be the binary expression of  $t$ . By the definition of the TREEBASEDAGGREGATION, we have that

$$r_{j,k}(t) - \sum_{s \leq t} u_{s,j,k} = \sum_{\ell=0}^L b_\ell(t) w_\ell, \tag{EC.1}$$

where  $\{w_\ell\}_{\ell=0}^L \stackrel{i.i.d.}{\sim} \text{Lap}(2/\varepsilon')$  with  $\varepsilon' = \varepsilon/(L+1)$ . Invoke the concentration inequality for sums of i.i.d. centered Laplace random variables (Chan et al. 2011, Corollary 2.9). We have with probability  $1 - O(T^{-3})$  that

$$\begin{aligned} \left| \sum_{\ell=0}^L b_\ell(t) w_\ell \right| &\leq 2\varepsilon^{-1}(L+1) \left( \sqrt{L+1} + \sqrt{\ln(2T^3)} \right) \sqrt{8 \ln(2T^3)} \\ &\leq 19\varepsilon^{-1} \ln^2(2T^3). \end{aligned} \quad (\text{EC.2})$$

Combine Eqs. (EC.1, EC.2) and apply a union bound over all  $t \in [T]$ ,  $j \in [J]$  and  $k \in [5]$ . Lemma EC.1 is thus proved.  $\square$

In the rest of the proof, define  $n_j = t - \varsigma_j$ ,  $\widehat{r}_{jk} = r_{jk}(t) - r_{jk}(\varsigma_j)$  and  $\widehat{\mu}_{jk} = \mu_{jk}(t) - \mu_{jk}(\varsigma_j)$ . Define  $\widetilde{r}_{jk} := \sum_{\tau=\varsigma_j+1}^t u_{j,\tau,k}$  and  $\widetilde{\mu}_{jk} := \sum_{\tau=\varsigma_j+1}^t v_{j,\tau,k}$ . Lemma EC.1 implies that with probability  $1 - O(T^{-1})$ ,

$$\max\{|\widetilde{r}_{jk} - \widehat{r}_{jk}|, |\widetilde{\mu}_{jk} - \widehat{\mu}_{jk}|\} \leq 38\varepsilon^{-1} \ln^2(2T^3). \quad (\text{EC.3})$$

On the other hand, observe that both  $\widetilde{\mu}_{jk}$  and  $\widetilde{r}_{jk}$  are sums of i.i.d. random variables. The following technical lemma then upper bounds the concentration of  $\widetilde{\mu}_{jk}$  and  $\widetilde{r}_{jk}$  towards their expected values.

**LEMMA EC.2.** *For each hypercube  $B_j$  define  $\overline{\chi}(B_j) := J \times \Pr[\mathbf{x} \in B_j] \in [0, C_X]$ . Let  $n_j = t - \varsigma_j$ . The following holds with probability  $1 - O(T^{-1})$  uniformly over all  $t \in [T]$ ,  $j \in [J]$  and  $k \in [5]$ :*

$$\max \left\{ \left| \frac{\widetilde{r}_{jk}}{n_j} - \frac{\overline{\chi}(B_j)h^d}{5n_j} f_{B_j}(\rho_{jk}) \right|, \left| \frac{\widetilde{\mu}_{jk}}{n_j} - \frac{\overline{\chi}(B_j)h^d}{5n_j} \right| \right\} \leq \sqrt{\frac{C_X h^d \ln(2T^3)}{n_j}} + \frac{1.5 \ln(2T^3)}{n_j}. \quad (\text{EC.4})$$

Furthermore,

$$\left| \frac{\widetilde{r}_{jk}}{\widetilde{\mu}_{jk}} - f_{B_j}(\rho_{jk}) \right| \leq \sqrt{\frac{\ln(2T^3)}{2\widetilde{\mu}_{jk}}}. \quad (\text{EC.5})$$

*Proof of Lemma EC.2.* For Eq. (EC.4) we will prove the concentration inequality involving  $\widetilde{\mu}_{jk}$  only, as the other inequality can be proved using the exact same argument. Note that for each  $j \in [J]$ ,  $s \in [\varsigma_j + 1, t]$  with  $s \equiv k \pmod{5}$ , we have that  $v_{j,s,k} \in \{0, 1\}$  almost surely and furthermore  $\Pr[v_{j,s,k} = 1] = \Pr[\mathbf{x}_s \in B_j, k \equiv s \pmod{5}] = \overline{\chi}(B_j)h^d/5$ . By Bernstein's inequality (Bennett 1962), for any particular  $t$ ,  $j$  and  $k$  it holds with probability  $1 - O(T^{-3})$  that

$$\left| \frac{\widetilde{\mu}_{jk}}{n_j} - \frac{\overline{\chi}(B_j)h^d}{5n_j} \right| \leq 2\sqrt{\frac{\overline{\chi}(B_j)h^d \ln(2T^3)}{5n_j}} + \frac{1.5 \ln(2T^3)}{n_j} \leq \sqrt{\frac{C_X h^d \ln(2T^3)}{n_j}} + \frac{1.5 \ln(2T^3)}{n_j}.$$

Apply the union bound over all  $t \in [T]$ ,  $j \in [J]$  and  $k \in [5]$ . We complete the proof of Eq. (EC.4).

We next prove Eq. (EC.5). Note that  $\tilde{r}_{jk}$  is a sum of  $\tilde{\mu}_{jk}$  i.i.d. random variables each with expectation  $f_{B_j}(\rho_{jk})$  and supported on  $[0, 1]$  almost surely. By Hoeffding's inequality (Hoeffding 1963), it holds with probability  $1 - O(T^{-3})$  that

$$\left| \frac{\tilde{r}_{jk}}{\tilde{\mu}_{jk}} - f_{B_j}(\rho_{jk}) \right| \leq \sqrt{\frac{\ln(2T^3)}{2\tilde{\mu}_{jk}}}.$$

Apply the union bound over all  $t \in [T]$ ,  $j \in [J]$  and  $k \in [5]$ . We complete the proof of Eq. (EC.5).  $\square$

Eq. (EC.3) and Lemma EC.2 together yield the following lemma:

LEMMA EC.3. *With probability  $1 - O(T^{-1})$  the following holds uniformly over all  $t \in [T]$ ,  $j \in [J]$ ,  $k \in [4]$  that satisfies  $\hat{\mu}_{jk} \geq c_2 = 76\varepsilon^{-1} \ln^2(2T^3)$ :  $2\hat{\mu}_{jk} \geq \tilde{\mu}_{jk} \geq \hat{\mu}_{jk}/2$ , and furthermore*

$$\left| \frac{\hat{r}_{jk}}{\hat{\mu}_{jk}} - f_{B_j}(\rho_{jk}) \right| \leq \frac{2c_2}{\tilde{\mu}_{jk}} + \sqrt{\frac{\ln(2T^3)}{2\tilde{\mu}_{jk}}} \leq \frac{4c_2}{\hat{\mu}_{jk}} + \sqrt{\frac{\ln(2T^3)}{\hat{\mu}_{jk}}}.$$

*Proof of Lemma EC.3.* Fix  $t \in [T]$ ,  $j \in [J]$  and  $k \in [5]$ . For notational simplicity define  $\beta := \bar{\chi}(B_j)/(5h^d)$ ,  $\Delta_r := \hat{r}_{jk} - \tilde{r}_{jk}$  and  $\Delta_\mu := \hat{\mu}_{jk} - \tilde{\mu}_{jk}$ . By Eq. (EC.3), the condition that  $\hat{\mu}_{jk} \geq c_2 = 76\varepsilon^{-1} \ln^2(2T^3)$  implies that  $2\hat{\mu}_{jk} \geq \tilde{\mu}_{jk} \geq \hat{\mu}_{jk}/2$ . Subsequently,

$$\begin{aligned} \left| \frac{\hat{r}_{jk}}{\hat{\mu}_{jk}} - \frac{\tilde{r}_{jk}}{\tilde{\mu}_{jk}} \right| &\leq \left| \frac{\tilde{r}_{jk} + \Delta_r}{\hat{\mu}_{jk}} - \frac{\tilde{r}_{jk}}{\tilde{\mu}_{jk}} \right| \leq \left| \frac{\tilde{r}_{jk}}{\hat{\mu}_{jk}} - \frac{\tilde{r}_{jk}}{\tilde{\mu}_{jk}} \right| + \frac{2|\Delta_r|}{\tilde{\mu}_{jk}} = \left| \frac{\tilde{r}_{jk}}{\tilde{\mu}_{jk} + \Delta_\mu} - \frac{\tilde{r}_{jk}}{\tilde{\mu}_{jk}} \right| + \frac{2|\Delta_r|}{\tilde{\mu}_{jk}} \\ &= \frac{\tilde{r}_{jk}}{\tilde{\mu}_{jk}} \left| \frac{\tilde{\mu}_{jk}}{\tilde{\mu}_{jk} + \Delta_\mu} - 1 \right| + \frac{2|\Delta_r|}{\tilde{\mu}_{jk}} = \frac{\tilde{r}_{jk}}{\tilde{\mu}_{jk}} \frac{|\Delta_\mu|}{\tilde{\mu}_{jk}} + \frac{2|\Delta_r|}{\tilde{\mu}_{jk}} \leq \frac{2(|\Delta_\mu| + |\Delta_r|)}{\tilde{\mu}_{jk}}, \end{aligned}$$

where the last inequality holds because  $\tilde{r}_{jk}/\tilde{\mu}_{jk} \in [0, 1]$  almost surely. By Eq. (EC.3) we have that  $|\Delta_\mu| + |\Delta_r| \leq 76\varepsilon^{-1} \ln^2(2T^3)$ . Subsequently,

$$\left| \frac{\hat{r}_{jk}}{\hat{\mu}_{jk}} - \frac{\tilde{r}_{jk}}{\tilde{\mu}_{jk}} \right| \leq \frac{152\varepsilon^{-1} \ln^2(2T^3)}{\tilde{\mu}_{jk}} = \frac{2c_2}{\tilde{\mu}_{jk}}. \quad (\text{EC.6})$$

Combining Eq. (EC.6) and Eq. (EC.4) in Lemma EC.2, we have with probability  $1 - O(T^{-3})$  that

$$\left| \frac{\hat{r}_{jk}}{\hat{\mu}_{jk}} - f_{B_j}(\rho_{jk}) \right| \leq \frac{2c_2}{\tilde{\mu}_{jk}} + \sqrt{\frac{\ln(2T^3)}{2\tilde{\mu}_{jk}}}.$$

With a union bound over  $t, j$  and  $k$  we prove the first inequality in Lemma EC.3. The second inequality in Lemma EC.3 then holds by noting that  $\tilde{\mu}_{jk} \geq \hat{\mu}_{jk}/2$ .  $\square$

Lemma EC.3 and Assumption (A2-a) immediately yield the following corollary:

COROLLARY EC.1. *Conditioned on the success event in Lemma EC.3, it holds for all  $t \in [T]$  and  $j \in [J]$  that  $p^*(B_j) \in [\rho_{j1}, \rho_{j4}]$ , where  $p^*(B_j) = \arg \max_p f_{B_j}(p)$ .*

We are now ready to prove Theorem 1.

*Proof of Theorem 1.* We will upper bound the regret incurred in each hypercube  $B_j$  separately. The proof is also conditioned on the success events in Lemmas EC.1, EC.2, EC.3 and Corollary EC.1 which occurs with probability  $1 - O(T^{-1})$ .

Fix a particular hypercube  $B_j$ . We partition the entire  $T$  selling periods into *epochs* denoted as  $\tau = 1, 2, 3, \dots$ , with each epoch starting with a time period at which  $\varsigma_j$  is reset (at the start of  $T$  time periods or as a result of the execution of Line 13 or 15 in Algorithm 1), and ending when either Line 13 or Line 15 is executed again to reset the  $\varsigma_j$  pointer. Let  $\mathcal{T}_j(\tau)$  be the collection of time periods during epoch  $\tau$  for hypercube  $j$ , and define  $n_j(\tau) := |\mathcal{T}_j(\tau)|$ . Note that  $\mathcal{T}_j(\tau)$  includes selling periods during which customers with  $\mathbf{x}_t \notin B_j$  arrive as well. Moreover, define  $\delta_\tau := \rho_{j5} - \rho_{j1} = (\bar{p} - \underline{p})(3/4)^{\tau-1}$  where the equality is by update rule of price range.

Let us fix a particular epoch  $\tau$  and let  $\mathcal{T}_j(\tau)$  be the set of all time periods in epoch  $\tau$ . Recall the definition that  $\tilde{\mu}_{jk}$  is the number of time periods in this epoch during which price  $\rho_{jk}$  is offered to an incoming customer with feature vector  $\mathbf{x} \in B_j$ . By Assumption (A3-a) and Corollary EC.1, the total regret incurred in the particular epoch and hypercube compared against  $f_{B_j}(p^*(B_j))$  is upper bounded by

$$\begin{aligned} \sum_{t \in \mathcal{T}_j(\tau)} \mathbf{1}\{\mathbf{x}_t \in B_j\} [f_{B_j}(p^*(B_j)) - f_{B_j}(p_t)] &\leq 5 \max_k \{\tilde{\mu}_{jk}\} \times \frac{C_H^2}{2} \max_k \{|\rho_{jk} - p^*(B_j)|^2\} \\ &\leq 2.5 C_H^2 \delta_\tau^2 \times \max_k \{\tilde{\mu}_k\}. \end{aligned} \quad (\text{EC.7})$$

To upper bound Eq. (EC.7) we need to upper bound  $\tilde{\mu}_k$ . By the description of the CPPQ policy in Algorithm 1, the epoch  $\tau$  will terminate when either one of the two following conditions are met:

$$\underline{\mu}_{1 \rightarrow 3} \geq c_2 \quad \text{and} \quad \min \left\{ \frac{\hat{r}_{j2}}{\hat{\mu}_{j2}} - \frac{\hat{r}_{j1}}{\hat{\mu}_{j1}}, \frac{\hat{r}_{j3}}{\hat{\mu}_{j3}} - \frac{\hat{r}_{j2}}{\hat{\mu}_{j2}} \right\} \geq \frac{3c_1}{\sqrt{\underline{\mu}_{1 \rightarrow 3}}} + \frac{3c'_1}{\underline{\mu}_{1 \rightarrow 3}}, \quad (\text{EC.8})$$

$$\underline{\mu}_{3 \rightarrow 5} \geq c_2 \quad \text{and} \quad \min \left\{ \frac{\hat{r}_{j3}}{\hat{\mu}_{j3}} - \frac{\hat{r}_{j4}}{\hat{\mu}_{j4}}, \frac{\hat{r}_{j4}}{\hat{\mu}_{j4}} - \frac{\hat{r}_{j5}}{\hat{\mu}_{j5}} \right\} \geq \frac{3c_1}{\sqrt{\underline{\mu}_{3 \rightarrow 5}}} + \frac{3c'_1}{\underline{\mu}_{3 \rightarrow 5}}. \quad (\text{EC.9})$$

Note that when  $p^*(B_j) \in [\rho_{j1}, \rho_{j5}]$ , Assumption (A2-a) implies that either  $\min\{f_{B_j}(\rho_{j2}) - f_{B_j}(\rho_{j1}), f_{B_j}(\rho_{j3}) - f_{B_j}(\rho_{j2})\} \geq \frac{\sigma_H^2}{32} \delta_\tau^2$  or  $\min\{f_{B_j}(\rho_{j3}) - f_{B_j}(\rho_{j4}), f_{B_j}(\rho_{j4}) - f_{B_j}(\rho_{j5})\} \geq \frac{\sigma_H^2}{32} \delta_\tau^2$  holds. Assume without loss of generality that  $\min\{f_{B_j}(\rho_{j2}) - f_{B_j}(\rho_{j1}), f_{B_j}(\rho_{j3}) - f_{B_j}(\rho_{j2})\} \geq \frac{\sigma_H^2}{32} \delta_\tau^2$ . Then by Lemma EC.3, the condition (EC.8) is satisfied when

$$\underline{\mu}_{1 \rightarrow 3} = c_2 + \text{const.} \times \left[ \frac{c_1^2}{\sigma_H^4 \delta_\tau^4} + \frac{c'_1}{\sigma_H^2 \delta_\tau^2} \right]. \quad (\text{EC.10})$$

Note that  $\widehat{\mu}_{jk} \geq \widetilde{\mu}_{jk}/2$  thanks to Lemma [EC.2](#). Eq. [\(EC.10\)](#) and the symmetric case of  $\min\{f_{B_j}(\rho_{j3}) - f_{B_j}(\rho_{j4}), f_{B_j}(\rho_{j4}) - f_{B_j}(\rho_{j5})\} \geq \frac{\sigma_H^2}{32} \delta_\tau^2$  are then implied by

$$\min_k \{\widetilde{\mu}_{jk}\} \leq 2c_2 + \text{const.} \times \left[ \frac{c_1^2}{\sigma_H^4 \delta_\tau^4} + \frac{c_1'}{\sigma_H^2 \delta_\tau^2} \right]. \quad (\text{EC.11})$$

On the other hand, note that  $|f_{B_j}(\rho_{j,k+1}) - f_{B_j}(\rho_{j,k})| \leq \frac{C_H^2}{2} \delta_\tau^2$  for all  $k \in \{1, 2, 3, 4, 5\}$ . With Lemma [EC.3](#) and the stopping condition in Eqs. [\(EC.8,EC.9\)](#), we have at the end of epoch  $\tau$  that

$$\max_k \{\widetilde{\mu}_{jk}\} \geq \max_k \{\widehat{\mu}_{jk}/2\} \geq \frac{c_2}{2} + \frac{2c_1^2}{C_H^2 \delta_\tau^4} + \frac{c_1'}{C_H \delta_\tau^2}. \quad (\text{EC.12})$$

Contrasting Eq. [\(EC.11\)](#) with Eq. [\(EC.7\)](#), we need to upper bound the differences between  $\widetilde{\mu}_{jk}$  for  $k \in [5]$ . This can be done by using Eq. [\(EC.4\)](#) in Lemma [EC.2](#) and the triangle inequality, which yield for every  $k, k' \in \{1, 2, 3, 4, 5\}$  that

$$|\widetilde{\mu}_{jk} - \widetilde{\mu}_{jk'}| \leq 2\sqrt{C_X h^d n_j \ln(2T^3)} + 3\ln(2T^3). \quad (\text{EC.13})$$

Combine Eqs. [\(EC.7,EC.11,EC.12,EC.13\)](#). The total regret incurred in hypercube  $B_j$  and epoch  $\tau$  (such that  $\delta_\tau = \rho_{j4} - \rho_{j1}$ ) is upper bounded by

$$\begin{aligned} & 2C_H^2 \delta_\tau^2 \times \text{const.} \times \left[ c_2 + \frac{c_1^2}{\sigma_H^4 \delta_\tau^4} + \frac{c_1'}{\sigma_H^2 \delta_\tau^2} + \sqrt{C_X h^d n_j \ln(2T^3)} + \ln(2T^3) \right] \\ & \leq \frac{\text{const.} \times c_1^2 C_H^2}{\sigma_H^4 \delta_\tau^2} + \text{const.} \times C_H^2 \left[ c_2 + \sigma_H^{-2} c_1' + \sqrt{C_X h^d n_j \ln(2T^3)} + \ln(2T^3) \right] \\ & \leq \frac{\text{const.} \times c_1^2 C_H^2}{\sigma_H^4} \sqrt{\frac{C_H^2 \max_k \widetilde{\mu}_{jk}}{2c_1^2}} + \text{const.} \times C_H^2 \left[ c_2 + \sigma_H^{-2} c_1' + \sqrt{C_X h^d T \ln(2T^3)} + \ln(2T^3) \right] \end{aligned} \quad (\text{EC.14})$$

$$\leq \text{const.} \times c_1 C_H^3 \sigma_H^{-4} \max_k \{\sqrt{\widetilde{\mu}_{jk}}\} + \text{const.} \times C_H^2 \left[ c_2 + \sigma_H^{-2} c_1' + \sqrt{C_X h^d T \ln(2T^3)} + \ln(2T^3) \right]. \quad (\text{EC.15})$$

Here, Eq. [\(EC.14\)](#) holds because  $\delta_\tau^{-4} \leq C_H^2 \max_k \{\widetilde{\mu}_{jk}\} / (2c_1^2)$  thanks to Eq. [\(EC.12\)](#). Note also that Eq. [\(EC.12\)](#) implies an upper bound of  $\ln(C_H^2 T)$  on the total number of epochs for each  $j$ . Define  $C_1' := \text{const.} \times c_1 C_H^3 \sigma_H^{-4} \ln(C_H^2 T) \leq \text{const.} \times C_H^3 \sigma_H^{-4} \ln^2(2C_H^2 T^3)$ ,  $C_2' := \text{const.} \times C_H^2 \varepsilon (c_2 + \sigma_H^{-2} c_1') \ln(C_H^2 T) \leq \text{const.} \times C_H^2 \sigma_H^{-2} \ln^3(2C_H^2 T^3)$  and  $C_3' = \text{const.} \times C_H^2 (\sqrt{C_X \ln(2T^3)} + \ln(2T^3)) \ln(C_H^2 T) \leq \text{const.} \times C_H^2 \sqrt{C_X} \ln^2(2C_H^2 T^3)$ . Summing Eq. [\(EC.15\)](#) over  $j \in [J]$  and  $k \in [5]$ , we have that

$$\sum_{j=1}^J \sum_{t=1}^T \mathbf{1}\{\mathbf{x}_t \in B_j\} [f_{B_j}(p^*(B_j)) - f_{B_j}(p_t)] \leq C_1' \sum_{j,k} \sqrt{\widetilde{\mu}_{jk}} + C_2' J / \varepsilon + C_3' J \times (\sqrt{h^d T} + 1)$$

$$\leq C'_1 \sqrt{5J} \sqrt{\sum_{j,k} \tilde{\mu}_{jk}} + \frac{C'_2 J}{\varepsilon} + 2C'_3 J \sqrt{h^d T} \leq \frac{2(C'_1 + C'_3) \sqrt{T}}{h^{d/2}} + \frac{C'_2}{\varepsilon h^d}. \quad (\text{EC.16})$$

Additionally, Assumption (A3-a) with  $B = \{\mathbf{x}_t\}$  and (A3-b), (A3-c) imply that  $|f(p^*(\mathbf{x}), \mathbf{x}) - f(p^*(B_j), \mathbf{x})| \leq \frac{C_H^2 C_p^2}{2} \sup_{\mathbf{x}, \mathbf{x}' \in B_j} \|\mathbf{x} - \mathbf{x}'\|_2^2 \leq \frac{C_H^2 C_p^2 d}{2} h^2$ . This together with Eq. (EC.16) yields with probability  $1 - O(T^{-1})$  that

$$\sum_{t=1}^T f(p^*(\mathbf{x}_t), \mathbf{x}_t) - f(p_t, \mathbf{x}_t) \leq \frac{2(C'_1 + C'_3) \sqrt{T}}{h^{d/2}} + \frac{C'_2}{\varepsilon h^d} + \frac{C_H^2 C_p^2 d}{2} h^2 T. \quad (\text{EC.17})$$

With the choice  $J = \lceil T^{d/(d+4)} \rceil$  corresponding to  $h = J^{-1/d} \approx T^{-1/(d+4)}$ , the above inequality proves Theorem 1 with  $2(C'_1 + C'_3) + C_H^2 C_p^2 d/2 \leq \text{const.} \times C_H^2 (\sigma_H^{-4} + C_H \sqrt{C_X}) \ln^2(2C_H^2 T^3) + C_H^2 C_p^2 d/2$  and  $\bar{C}'_1 = 2C'_2 \leq \text{const.} \times C_H^2 \sigma_H^{-2} \ln^3(2C_H^2 T^3)$ .  $\square$

## EC.2. Proofs of technical lemmas in Section 6

### EC.2.1. Proof of Lemma 3

Let  $\eta := (1 - 2^{-1/d})/2$  and define  $H_j := \{\mathbf{x} \in B_j : \mathfrak{d}(\mathbf{x}, \partial B_j) \geq \eta h\}$ . Since  $P_X$  is the uniform distribution on  $[0, 1]^d$ , we have  $\Pr[\mathbf{x} \in H_j] = 0.5 \Pr[\mathbf{x} \in B_j] = 0.5 h^d$ . For any  $\mathbf{x} \in H_j$ , by simple algebra we have that

$$p_\nu^*(\mathbf{x}) = \frac{2}{3}, \quad \text{if } \nu_j = 0; \quad (\text{EC.18})$$

$$p_\nu^*(\mathbf{x}) = \frac{2}{3} - \frac{\mathfrak{d}(\mathbf{x}, \partial B_j)}{3(1 + \mathfrak{d}(\mathbf{x}, \partial B_j))} \leq \frac{2}{3} - \frac{1}{6} \eta h, \quad \text{if } \nu_j = 1. \quad (\text{EC.19})$$

Define  $\mathcal{A} := \mathcal{S}_0 \{p : p \geq \frac{2}{3} - \frac{\eta h}{12}\}$  and  $\mathcal{B} := \mathcal{S}_1 = \{p : p \leq \frac{2}{3} - \frac{\eta h}{12}\}$ . Since  $f_\nu(p, \mathbf{x})$  is strongly concave in  $p$ , we have that

$$f_\nu(p_\nu^*(\mathbf{x}), \mathbf{x}) - f_\nu(p, \mathbf{x}) \geq \frac{\eta^2 h^2}{144}, \quad \forall p \in \mathcal{B}, \text{ if } \nu_j = 0; \quad (\text{EC.20})$$

$$f_\nu(p_\nu^*(\mathbf{x}), \mathbf{x}) - f_\nu(p, \mathbf{x}) \geq \frac{\eta^2 h^2}{144}, \quad \forall p \in \mathcal{A}, \text{ if } \nu_j = 1. \quad (\text{EC.21})$$

Subsequently,

$$\begin{aligned} \mathfrak{R}(\pi) &= \sup_{\nu \in \{0,1\}^d} \mathbb{E}_\nu^\pi \left[ \sum_{t=1}^T f_\nu(p_\nu^*(\mathbf{x}_t), \mathbf{x}_t) - f_\nu(p_t, \mathbf{x}_t) \right] \geq \frac{1}{2^d} \sum_{\nu \in \{0,1\}^d} \mathbb{E}_\nu^\pi \left[ \sum_{t=1}^T f_\nu(p_\nu^*(\mathbf{x}_t), \mathbf{x}_t) - f_\nu(p_t, \mathbf{x}_t) \right] \\ &\geq \sum_{t=1}^T \frac{1}{2^d} \sum_{\nu \in \{0,1\}^d} \frac{1}{2^J} \sum_{j=1}^J \mathbb{E}_\nu^\pi [f_\nu(p_\nu^*(\mathbf{x}_t), \mathbf{x}_t) - f_\nu(p_t, \mathbf{x}_t) | \mathbf{x}_t \in H_j] \end{aligned}$$

$$\geq \sum_{t=1}^T \frac{1}{2^d} \sum_{\nu \in \{0,1\}^d} \frac{1}{2^J} \sum_{j=1}^J \mathbb{E}_{\nu}^{\pi} \left[ \frac{\eta^2 h^2}{144} \mathbf{1}\{p_t \in \mathcal{S}_{\nu_j}\} \middle| x_t \in H_j \right],$$

which is to be proved.

### EC.2.2. Proof of Lemma 4

Fix  $j \in [J]$ . Let  $M_{\pm j,t}^{\pi}(\cdot)$  be the distributions of  $z_t$ , which is measurable conditioned on  $\mathbf{z}_{<t} = (z_1, \dots, z_{t-1})$  thanks to the definition in Eqs. (4,5). More specifically,  $M_{\pm j,t}^{\pi}(Z|\mathbf{z}_{<t}) = \int_{\mathcal{S}} Q_t(Z|s_t, \mathbf{z}_{<t}) dP_{\pm j,t}^{\pi}(s_t|\mathbf{z}_{<t})$ . By the chain rule of KL-divergence, we have that

$$D_{\text{KL}}^{\text{sy}}(M_{+j}^{\pi}, M_{-j}^{\pi}) \leq 2 \sum_{t=1}^T \int_{\mathcal{Z}^{t-1}} D_{\text{KL}}^{\text{sy}}(M_{+j,t}^{\pi}(\cdot|\mathbf{z}_{<t}), M_{-j,t}^{\pi}(\cdot|\mathbf{z}_{<t})) d\bar{M}_{<t}^{\pi}(d\mathbf{z}_{<t}). \quad (\text{EC.22})$$

Now fix  $t \in [T]$  and define  $\varsigma_{jt}(\mathbf{z}_{<t}) := D_{\text{KL}}^{\text{sy}}(M_{+j,t}^{\pi}(\cdot|\mathbf{z}_{<t}), M_{-j,t}^{\pi}(\cdot|\mathbf{z}_{<t}))$ . Let  $m_{+j}(\cdot|\mathbf{z}_{<t}), m_{-j}(\cdot|\mathbf{z}_{<t})$  be the PDFs of  $M_{+j,t}^{\pi}(\cdot|\mathbf{z}_{<t})$  and  $M_{-j,t}^{\pi}(\cdot|\mathbf{z}_{<t})$ . Define also  $m^0(z|\mathbf{z}_{<t}) := \inf_{s_t \in \mathcal{S}} q_t(z|s_t, \mathbf{z}_{<t})$ , where  $q_t$  is the PDF of  $Q_t$  defined in Eq. (4). We then have

$$\begin{aligned} \varsigma_{jt}(\mathbf{z}_{<t}) &= \int_{\mathcal{Z}} [m_{+j}(z|\mathbf{z}_{<t}) - m_{-j}(z|\mathbf{z}_{<t})] \ln \frac{m_{+j}(z|\mathbf{z}_{<t})}{m_{-j}(z|\mathbf{z}_{<t})} dz \\ &\leq \int_{\mathcal{Z}} [m_{+j}(z|\mathbf{z}_{<t}) - m_{-j}(z|\mathbf{z}_{<t})]^2 \cdot \frac{dz}{\min\{m_{+j}(z|\mathbf{z}_{<t}), m_{-j}(z|\mathbf{z}_{<t})\}} \\ &\leq \int_{\mathcal{Z}} [m_{+j}(z|\mathbf{z}_{<t}) - m_{-j}(z|\mathbf{z}_{<t})]^2 \cdot \frac{dz}{m^0(z|\mathbf{z}_{<t})}, \end{aligned} \quad (\text{EC.23})$$

where the first inequality holds because  $|\ln(a/b)| \leq |a-b|/\min\{a,b\}$  for all  $a, b \in \mathbb{R}_+$  (see, e.g., Duchi et al. 2018, Lemma 4). Note that  $m_{\pm}(z|\mathbf{z}_{<t}) = \int_{\mathcal{S}} q_t(z|s_t, \mathbf{z}_{<t}) dP_{\pm j,t}^{\pi}(s_t|\mathbf{z}_{<t})$ , and  $\int_{\mathcal{S}} dP_{+j,t}^{\pi}(s_t|\mathbf{z}_{<t}) - dP_{-j,t}^{\pi}(s_t|\mathbf{z}_{<t}) = 1 - 1 = 0$ . We then have

$$\begin{aligned} m_{+j}(z|\mathbf{z}_{<t}) - m_{-j}(z|\mathbf{z}_{<t}) &= \int_{\mathcal{S}} q_t(z|s_t, \mathbf{z}_{<t}) [dP_{+j,t}^{\pi}(s_t|\mathbf{z}_{<t}) - dP_{-j,t}^{\pi}(s_t|\mathbf{z}_{<t})] \\ &= \int_{\mathcal{S}} (q_t(z|s_t, \mathbf{z}_{<t}) - m^0(z|\mathbf{z}_{<t})) [dP_{+j,t}^{\pi}(s_t|\mathbf{z}_{<t}) - dP_{-j,t}^{\pi}(s_t|\mathbf{z}_{<t})] \\ &= m^0(z|\mathbf{z}_{<t}) \int_{\mathcal{S}} \left( \frac{q_t(z|s_t, \mathbf{z}_{<t})}{m^0(z|\mathbf{z}_{<t})} - 1 \right) [dP_{+j,t}^{\pi}(s_t|\mathbf{z}_{<t}) - dP_{-j,t}^{\pi}(s_t|\mathbf{z}_{<t})]. \end{aligned}$$

Subsequently, Eq. (EC.23) can be upper bounded by

$$\varsigma_{jt}(\mathbf{z}_{<t}) \leq \int_{\mathcal{Z}} m^0(z|\mathbf{z}_{<t}) \left| \int_{\mathcal{S}} \left( \frac{q_t(z|s_t, \mathbf{z}_{<t})}{m^0(z|\mathbf{z}_{<t})} - 1 \right) [dP_{+j,t}^{\pi}(s_t|\mathbf{z}_{<t}) - dP_{-j,t}^{\pi}(s_t|\mathbf{z}_{<t})] \right|^2 dz$$

Note that  $q_t(z|s_t, \mathbf{z}_{<t})/m^0(z|\mathbf{z}_{<t}) \leq e^{2\epsilon}$  for all  $z \in \mathcal{Z}$ , because  $\pi$  satisfies  $2\epsilon$ -LDP. Note also that  $\int_{\mathcal{Z}} m^0(z|\mathbf{z}_{<t}) dz = \int_{\mathcal{Z}} \inf_{s_t \in \mathcal{S}} q_t(z|s_t, \mathbf{z}_{<t}) dz \leq \inf_{s_t \in \mathcal{S}} \int_{\mathcal{Z}} q_t(z|s_t, \mathbf{z}_{<t}) dz \leq 1$ . The above inequality can

then be reduced to

$$\varsigma_{jt}(\mathbf{z}_{<t}) \leq (e^{2\varepsilon} - 1)^2 \sup_{\|\gamma\|_\infty \leq 1} \left| \int_{\mathcal{S}} \gamma(s_t, \mathbf{z}_{<t}) [dP_{+j,t}^\pi(s_t | \mathbf{z}_{<t}) - dP_{-j,t}^\pi(s_t | \mathbf{z}_{<t})] \right|^2. \quad (\text{EC.24})$$

Combining Eqs. (EC.22, EC.24) we obtain

$$\begin{aligned} & D_{\text{KL}}^{\text{sy}}(M_{+j}^\pi, M_{-j}^\pi) \\ & \leq 2(e^{2\varepsilon} - 1)^2 \sum_{t=1}^T \sup_{\|\gamma\|_\infty \leq 1} \int_{\mathcal{Z}^{t-1}} \left| \int_{\mathcal{S}} \gamma(s_t, \mathbf{z}_{<t}) [dP_{+j,t}^\pi(s_t | \mathbf{z}_{<t}) - dP_{-j,t}^\pi(s_t | \mathbf{z}_{<t})] \right|^2 d\bar{M}_{<t}^\pi(dz_{<t}). \end{aligned}$$

Summing both sides of the above inequality over  $j = 1, 2, \dots, J$  we complete the proof of Lemma 4.

### EC.2.3. Proof of Lemma 5

Recall the decomposition that  $P_{\pm j,t}^\pi(\mathbf{x}_t, y_t, p_t | \mathbf{z}_{<t}) = \chi(\mathbf{x}_t) A_t(p_t | \mathbf{x}_t, \mathbf{z}_{<t}) \Pr_{\pm j}(y_t | p_t, \mathbf{x}_t)$ . Because  $P_{+j}^\pi$  and  $P_{-j}^\pi$  are exactly the same for  $\mathbf{x} \notin B_j$ , it suffices to consider only  $\mathbf{x} \in B_j$ . For any  $\mathbf{x} \in B_j$ , the distribution of  $\mathbf{x}$  and  $p$  is independent of the underlying demand model  $f_\nu$ . Hence,

$$\begin{aligned} \|P_{+j,t}^\pi(\cdot | \mathbf{z}_{<t}) - P_{-j,t}^\pi(\cdot | \mathbf{z}_{<t})\|_{\text{TV}} & \leq \frac{1}{2} \int_{B_j} \mathbb{E}_{p \sim A_t(\cdot | \mathbf{x}, \mathbf{z}_{<t})} \left[ \sup_{\nu_j \neq \nu'_j} |\lambda_\nu(p, \mathbf{x}) - \lambda_{\nu'}(p, \mathbf{x})| \right] dP_X(\mathbf{x}) \\ & \leq \frac{1}{2} \int_{B_j} \mathbb{E}_{p \sim A_t(\cdot | \mathbf{x}, \mathbf{z}_{<t})} \left[ \left| \frac{1}{3} - \frac{p}{2} \right| \sup_{\mathbf{x} \in B_j} \vartheta(\mathbf{x}, \partial B_j) \right] dP_X(\mathbf{x}) \\ & \leq \frac{\sqrt{dh}}{4} \int_{B_j} \mathbb{E}_{p \sim A_t(\cdot | \mathbf{x}, \mathbf{z}_{<t})} [|p - p_0|] dP_X(\mathbf{x}), \end{aligned}$$

where  $p_0 = 2/3$ . Note that  $\int_{B_j} dP_X(\mathbf{x}) = \Pr[\mathbf{x} \in B_j] = 1/J$ . Subsequently, by Jensen's inequality that  $(\mathbb{E}[\cdot])^2 \leq \mathbb{E}[\cdot^2]$ , we have

$$\|P_{+j,t}^\pi(\cdot | \mathbf{z}_{<t}) - P_{-j,t}^\pi(\cdot | \mathbf{z}_{<t})\|_{\text{TV}}^2 \leq \frac{dh^2}{16J^2} \mathbb{E}_{\mathbf{x} \sim U(B_j)} \mathbb{E}_{p \sim A_t(\cdot | \mathbf{x}, \mathbf{z}_{<t})} [(p - p_0)^2],$$

where  $U(B_j)$  is the uniform distribution on  $B_j$ . This proves Lemma 5.

### EC.2.4. Proof of Lemma 6

Let  $\lambda_\nu, f_\nu$  be the demand model corresponding to an arbitrary  $\nu \in \{0, 1\}^J$ , and  $\pi$  be a personalized pricing policy. Let  $\mathbf{x} \in B_j$  be an arbitrary context vector belonging to hypercube  $B_j$ , and  $p^*(\mathbf{x}) = \arg \max_p f_\nu(p, \mathbf{x})$ . Eqs. (EC.18, EC.19) in the proof of Lemma 3 show that  $|p^*(\mathbf{x}) - p_0| \leq \eta h/6 \leq$

$h/12$ , where  $p_0 = 2/3$ , regardless of the value of  $\nu_j$ . Note also that  $f_\nu(p, \mathbf{x})$  is strongly concave with respect to  $p$ . Subsequently, we have for all  $\mathbf{x} \in [0, 1]^d$  and  $p \in [0, 1]$  that

$$f(\mathbf{p}^*(\mathbf{x}), \mathbf{x}) - f(p, \mathbf{x}) \geq (p - p^*(\mathbf{x}))^2 \geq \inf_{|p' - p_0| \leq h/12} (p - p')^2 \geq \frac{1}{4} \phi(|p - p_0|^2, h^2). \quad (\text{EC.25})$$

Consequently,

$$\begin{aligned} \mathfrak{R}(\pi) &= \sup_{\nu \in \{0,1\}^J} \mathbb{E}_\nu^\pi \left[ \sum_{t=1}^T f_\nu(p^*(\mathbf{x}_t), \mathbf{x}_t) - f_\nu(p_t, \mathbf{x}_t) \right] \geq \frac{1}{2^J} \sum_{\nu \in \{0,1\}^J} \mathbb{E}_\nu^\pi \left[ \sum_{t=1}^T f_\nu(p^*(\mathbf{x}_t), \mathbf{x}_t) - f_\nu(p_t, \mathbf{x}_t) \right] \\ &\geq \frac{1}{2^J} \sum_{\nu \in \{0,1\}^J} \mathbb{E}_\nu^\pi \left[ \sum_{t=1}^T \frac{1}{4} \phi(|p_t - p_0|^2, h^2) \right] \\ &= \frac{1}{2^J} \sum_{\nu \in \{0,1\}^J} \sum_{t=1}^T \mathbb{E} \left[ \frac{1}{4} \phi(|p_t - p_0|^2, h^2) \middle| p_t \sim A_t(\cdot | \mathbf{x}_t, \mathbf{z}_{<t}), \mathbf{x}_t \sim P_X, \mathbf{z}_{<t} \sim M_{\nu, <t}^\pi \right] \\ &= \frac{1}{4} \sum_{t=1}^T \mathbb{E} \left[ \phi(|p_t - p_0|^2, h^2) \middle| p_t \sim A_t(\cdot | \mathbf{x}_t, \mathbf{z}_{<t}), \mathbf{x}_t \sim P_X, \mathbf{z}_{<t} \sim \overline{M}_{<t}^\pi \right], \end{aligned}$$

which is to be proved.
